# Supplementary material for: Biological Evaluation of Alkyl Triphenylphosphonium Ostruthin Derivatives as Potential Anti-Inflammatory Agents Targeting the Nuclear Factor κB Signaling Pathway in Human Lung Adenocarcinoma A549 Cells
Source: MDPI journal article supplement (doi:10.3390/biochem1020010), 2021-09-02
Supplement: s1 [file s1]

Archive with 1 entries (1 files):
- biochem-1317959-supplementary.pdf
