# Supplementary material for: Biological Evaluation of Alkyl Triphenylphosphonium Ostruthin Derivatives as Potential Anti-Inflammatory Agents Targeting the Nuclear Factor κB Signaling Pathway in Human Lung Adenocarcinoma A549 Cells
Source: MDPI journal article supplement (doi:10.3390/biochem1020010), 2021-09-02
Supplement: s1 [file s1 › biochem-1317959-supplementary.pdf]

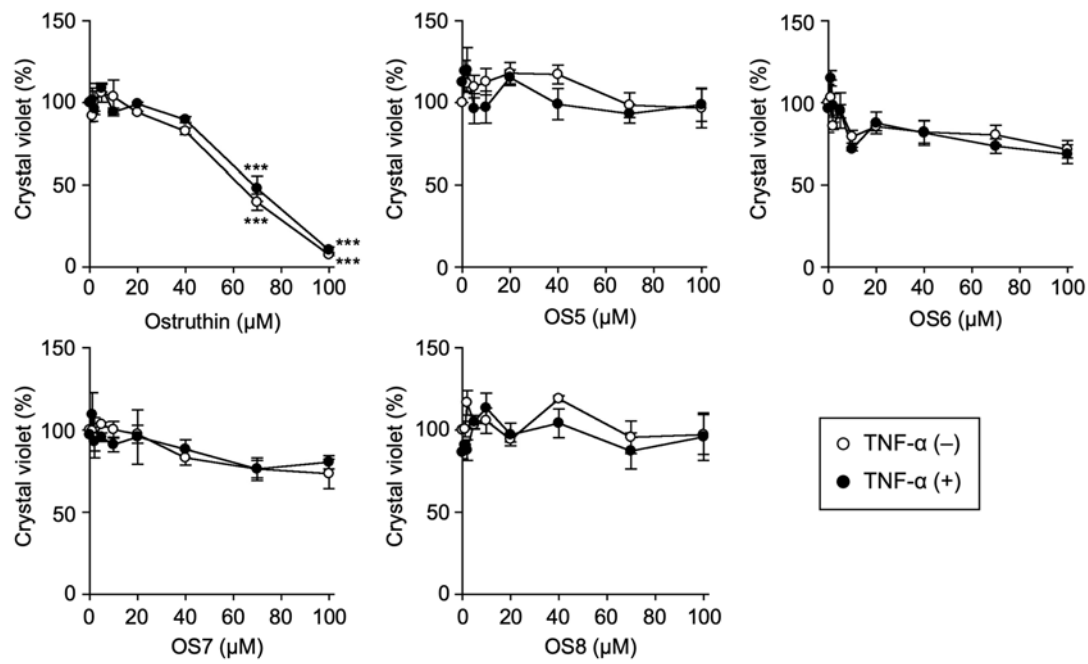

**Figure S1.** Ostruthin decreased cell viability, whereas OS5, OS6, OS7, and OS8 did not. A549 cells were treated as described in Figure 2. Cells were stained with crystal violet. Crystal violet (%) represents the mean  $\pm$  S.E. of three independent experiments. \*\*\* $P < 0.001$ .

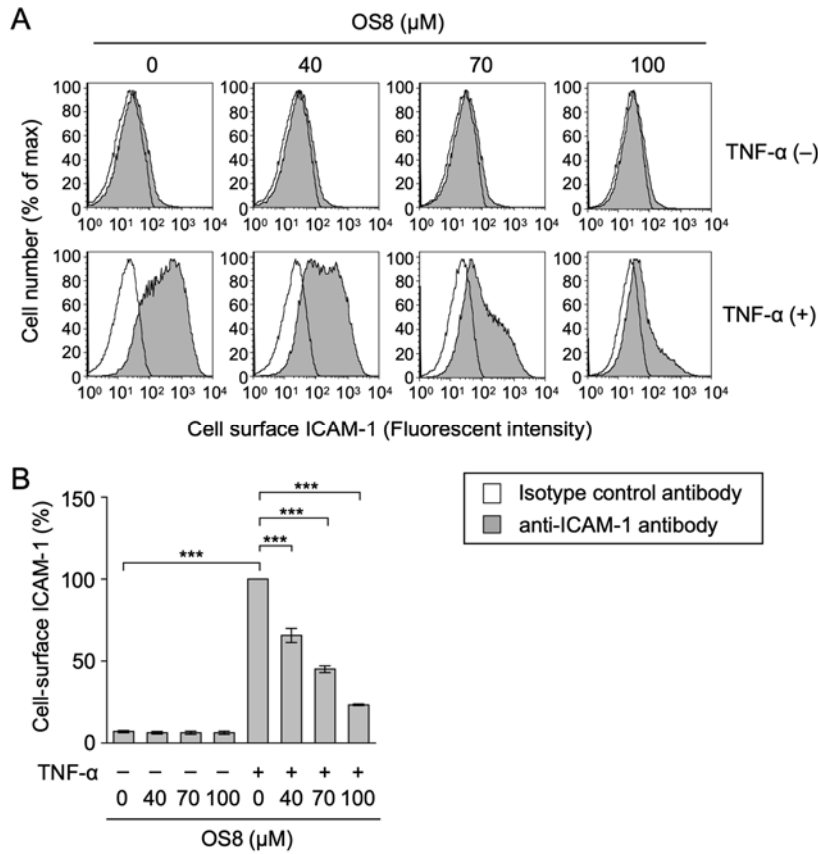

**Figure S2.** OS8 inhibited TNF- $\alpha$ -induced cell-surface ICAM-1 expression in a dose-dependent manner. (A and B) A549 cells were treated as described in Figure 2. Cells were stained with an isotype control antibody (transparent area) or anti-ICAM-1 antibody (gray area) together with a phycoerythrin-conjugated secondary antibody and then analyzed by flow cytometry. Histograms were representative of three independent experiments (A). Cell-surface ICAM-1 (%) represents the mean  $\pm$  S.E. of three independent experiments (B). \*\*\* $P < 0.001$ .
